# Supplementary material
Source: PubMed Central journal article supplement (PMC8938957)
Supplement: NIHMS1786292-supplement-Supplementary_Material.pdf [file NIHMS1786292-supplement-Supplementary_Material.pdf]

## Supplemental Material

### Appendix S1- National Drug Codes (NDCs) used to define DOACs

| <b>NDC</b>  | <b>Generic Name</b>           | <b>Brand Name</b> |
|-------------|-------------------------------|-------------------|
| 00003089331 | apixaban                      | Eliquis           |
| 00003089421 | apixaban                      | Eliquis           |
| 00003089321 | apixaban                      | Eliquis           |
| 00003089431 | apixaban                      | Eliquis           |
| 00003089470 | apixaban                      | Eliquis           |
| 00003376474 | apixaban                      | Eliquis           |
| 00597035556 | dabigatran etexilate mesylate | Pradaxa           |
| 00597013554 | dabigatran etexilate mesylate | Pradaxa           |
| 00597014960 | dabigatran etexilate mesylate | Pradaxa           |
| 00597035509 | dabigatran etexilate mesylate | Pradaxa           |
| 00597010760 | dabigatran etexilate mesylate | Pradaxa           |
| 00597036055 | dabigatran etexilate mesylate | Pradaxa           |
| 00597013560 | dabigatran etexilate mesylate | Pradaxa           |
| 00597014954 | dabigatran etexilate mesylate | Pradaxa           |
| 21695089960 | dabigatran etexilate mesylate | Pradaxa           |
| 00597010860 | dabigatran etexilate mesylate | Pradaxa           |
| 00597010754 | dabigatran etexilate mesylate | Pradaxa           |
| 54569627600 | dabigatran etexilate mesylate | Pradaxa           |
| 00597036082 | dabigatran etexilate mesylate | Pradaxa           |
| 00597010854 | dabigatran etexilate mesylate | Pradaxa           |
| 65597020230 | edoxaban tosylate             | Savaysa           |
| 65597020330 | edoxaban tosylate             | Savaysa           |
| 65597020310 | edoxaban tosylate             | Savaysa           |
| 65597020390 | edoxaban tosylate             | Savaysa           |
| 65597020130 | edoxaban tosylate             | Savaysa           |
| 65597020205 | edoxaban tosylate             | Savaysa           |
| 65597020210 | edoxaban tosylate             | Savaysa           |
| 65597020290 | edoxaban tosylate             | Savaysa           |
| 65597020305 | edoxaban tosylate             | Savaysa           |
| 50458057810 | rivaroxaban                   | Xarelto           |
| 50458058451 | rivaroxaban                   | Xarelto           |
| 50458057930 | rivaroxaban                   | Xarelto           |
| 50458058010 | rivaroxaban                   | Xarelto           |
| 50458057890 | rivaroxaban                   | Xarelto           |
| 50458058090 | rivaroxaban                   | Xarelto           |
| 50458057990 | rivaroxaban                   | Xarelto           |
| 50458057830 | rivaroxaban                   | Xarelto           |
| 50458058030 | rivaroxaban                   | Xarelto           |
| 50458057910 | rivaroxaban                   | Xarelto           |

**Appendix S2- Codes used to define CSVV**

| <b>Code</b>                              | <b>Description</b>                          | <b>Code Type</b> |
|------------------------------------------|---------------------------------------------|------------------|
| <b>Cutaneous Small Vessel Vasculitis</b> |                                             |                  |
| 287.0                                    | Allergic purpura                            | ICD-9-CM         |
| 446.2                                    | Hypersensitivity angiitis                   | ICD-9-CM         |
| 446.29                                   | Other specified hypersensitivity angiitis   | ICD-9-CM         |
| 446.20                                   | Unspecified hypersensitivity angiitis       | ICD-9-CM         |
| 709.1                                    | Vascular disorder of skin                   | ICD-9-CM         |
| D69.0                                    | Allergic purpura                            | ICD-10-CM        |
| L95.8                                    | Other vasculitis limited to the skin        | ICD-10-CM        |
| L95.9                                    | Vasculitis limited to the skin, unspecified | ICD-10-CM        |
| M31.0                                    | Hypersensitivity angiitis                   | ICD-10-CM        |

**Appendix S3-Codes used to define select autoimmune diseases**

| <b>Code</b>                            | <b>Description</b>                                                              | <b>Code Type</b> |
|----------------------------------------|---------------------------------------------------------------------------------|------------------|
| <b>Select Autoimmune Disease Codes</b> |                                                                                 |                  |
| 714.0                                  | Rheumatoid arthritis                                                            | ICD-9-CM         |
| 714                                    | Rheumatoid arthritis and other inflammatory polyarthropathies                   | ICD-9-CM         |
| M05.8                                  | Other rheumatoid arthritis with rheumatoid factor                               | ICD-10-CM        |
| M06.872                                | Other specified rheumatoid arthritis, left ankle and foot                       | ICD-10-CM        |
| M06.89                                 | Other specified rheumatoid arthritis, multiple sites                            | ICD-10-CM        |
| M06.871                                | Other specified rheumatoid arthritis, right ankle and foot                      | ICD-10-CM        |
| M06.879                                | Other specified rheumatoid arthritis, unspecified ankle and foot                | ICD-10-CM        |
| M06.87                                 | Other specified rheumatoid arthritis, ankle and foot                            | ICD-10-CM        |
| M06.812                                | Other specified rheumatoid arthritis, left shoulder                             | ICD-10-CM        |
| M06.811                                | Other specified rheumatoid arthritis, right shoulder                            | ICD-10-CM        |
| M06.819                                | Other specified rheumatoid arthritis, unspecified shoulder                      | ICD-10-CM        |
| M05.872                                | Other rheumatoid arthritis with rheumatoid factor of left ankle and foot        | ICD-10-CM        |
| M05.871                                | Other rheumatoid arthritis with rheumatoid factor of right ankle and foot       | ICD-10-CM        |
| M05.839                                | Other rheumatoid arthritis with rheumatoid factor of unspecified wrist          | ICD-10-CM        |
| M05.879                                | Other rheumatoid arthritis with rheumatoid factor of unspecified ankle and foot | ICD-10-CM        |
| M05.819                                | Other rheumatoid arthritis with rheumatoid factor of unspecified shoulder       | ICD-10-CM        |
| M05.829                                | Other rheumatoid arthritis with rheumatoid factor of unspecified elbow          | ICD-10-CM        |
| M05.87                                 | Other rheumatoid arthritis with rheumatoid factor of ankle and foot             | ICD-10-CM        |
| M05.82                                 | Other rheumatoid arthritis with rheumatoid factor of elbow                      | ICD-10-CM        |
| M05.84                                 | Other rheumatoid arthritis with rheumatoid factor of hand                       | ICD-10-CM        |
| M05.85                                 | Other rheumatoid arthritis with rheumatoid factor of hip                        | ICD-10-CM        |
| M05.86                                 | Other rheumatoid arthritis with rheumatoid factor of knee                       | ICD-10-CM        |
| M05.822                                | Other rheumatoid arthritis with rheumatoid factor of left elbow                 | ICD-10-CM        |
| M05.842                                | Other rheumatoid arthritis with rheumatoid factor of left hand                  | ICD-10-CM        |

|         |                                                                                          |           |
|---------|------------------------------------------------------------------------------------------|-----------|
| M05.852 | Other rheumatoid arthritis with rheumatoid factor of left hip                            | ICD-10-CM |
| M05.862 | Other rheumatoid arthritis with rheumatoid factor of left knee                           | ICD-10-CM |
| M05.812 | Other rheumatoid arthritis with rheumatoid factor of left shoulder                       | ICD-10-CM |
| M05.832 | Other rheumatoid arthritis with rheumatoid factor of left wrist                          | ICD-10-CM |
| M05.89  | Other rheumatoid arthritis with rheumatoid factor of multiple sites                      | ICD-10-CM |
| M05.821 | Other rheumatoid arthritis with rheumatoid factor of right elbow                         | ICD-10-CM |
| M05.841 | Other rheumatoid arthritis with rheumatoid factor of right hand                          | ICD-10-CM |
| M05.851 | Other rheumatoid arthritis with rheumatoid factor of right hip                           | ICD-10-CM |
| M05.861 | Other rheumatoid arthritis with rheumatoid factor of right knee                          | ICD-10-CM |
| M05.811 | Other rheumatoid arthritis with rheumatoid factor of right shoulder                      | ICD-10-CM |
| M05.831 | Other rheumatoid arthritis with rheumatoid factor of right wrist                         | ICD-10-CM |
| M05.81  | Other rheumatoid arthritis with rheumatoid factor of shoulder                            | ICD-10-CM |
| M05.849 | Other rheumatoid arthritis with rheumatoid factor of unspecified hand                    | ICD-10-CM |
| M05.859 | Other rheumatoid arthritis with rheumatoid factor of unspecified hip                     | ICD-10-CM |
| M05.869 | Other rheumatoid arthritis with rheumatoid factor of unspecified knee                    | ICD-10-CM |
| M05.80  | Other rheumatoid arthritis with rheumatoid factor of unspecified site                    | ICD-10-CM |
| M05.83  | Other rheumatoid arthritis with rheumatoid factor of wrist                               | ICD-10-CM |
| M06     | Other rheumatoid arthritis                                                               | ICD-10-CM |
| M06.80  | Other specified rheumatoid arthritis, unspecified site                                   | ICD-10-CM |
| M06.8   | Other specified rheumatoid arthritis                                                     | ICD-10-CM |
| M06.82  | Other specified rheumatoid arthritis, elbow                                              | ICD-10-CM |
| M06.84  | Other specified rheumatoid arthritis, hand                                               | ICD-10-CM |
| M06.85  | Other specified rheumatoid arthritis, hip                                                | ICD-10-CM |
| M06.86  | Other specified rheumatoid arthritis, knee                                               | ICD-10-CM |
| M06.822 | Other specified rheumatoid arthritis, left elbow                                         | ICD-10-CM |
| M06.842 | Other specified rheumatoid arthritis, left hand                                          | ICD-10-CM |
| M06.852 | Other specified rheumatoid arthritis, left hip                                           | ICD-10-CM |
| M06.862 | Other specified rheumatoid arthritis, left knee                                          | ICD-10-CM |
| M06.832 | Other specified rheumatoid arthritis, left wrist                                         | ICD-10-CM |
| M06.821 | Other specified rheumatoid arthritis, right elbow                                        | ICD-10-CM |
| M06.841 | Other specified rheumatoid arthritis, right hand                                         | ICD-10-CM |
| M06.851 | Other specified rheumatoid arthritis, right hip                                          | ICD-10-CM |
| M06.861 | Other specified rheumatoid arthritis, right knee                                         | ICD-10-CM |
| M06.831 | Other specified rheumatoid arthritis, right wrist                                        | ICD-10-CM |
| M06.81  | Other specified rheumatoid arthritis, shoulder                                           | ICD-10-CM |
| M06.859 | Other specified rheumatoid arthritis, unspecified hip                                    | ICD-10-CM |
| M06.829 | Other specified rheumatoid arthritis, unspecified elbow                                  | ICD-10-CM |
| M06.849 | Other specified rheumatoid arthritis, unspecified hand                                   | ICD-10-CM |
| M06.869 | Other specified rheumatoid arthritis, unspecified knee                                   | ICD-10-CM |
| M06.839 | Other specified rheumatoid arthritis, unspecified wrist                                  | ICD-10-CM |
| M06.88  | Other specified rheumatoid arthritis, vertebrae                                          | ICD-10-CM |
| M06.83  | Other specified rheumatoid arthritis, wrist                                              | ICD-10-CM |
| M05.67  | Rheumatoid arthritis of ankle and foot with involvement of other organs and systems      | ICD-10-CM |
| M05.62  | Rheumatoid arthritis of elbow with involvement of other organs and systems               | ICD-10-CM |
| M05.64  | Rheumatoid arthritis of hand with involvement of other organs and systems                | ICD-10-CM |
| M05.65  | Rheumatoid arthritis of hip with involvement of other organs and systems                 | ICD-10-CM |
| M05.66  | Rheumatoid arthritis of knee with involvement of other organs and systems                | ICD-10-CM |
| M05.672 | Rheumatoid arthritis of left ankle and foot with involvement of other organs and systems | ICD-10-CM |
| M05.622 | Rheumatoid arthritis of left elbow with involvement of other organs and systems          | ICD-10-CM |
| M05.642 | Rheumatoid arthritis of left hand with involvement of other organs and systems           | ICD-10-CM |

|         |                                                                                                                |           |
|---------|----------------------------------------------------------------------------------------------------------------|-----------|
| M05.652 | Rheumatoid arthritis of left hip with involvement of other organs and systems                                  | ICD-10-CM |
| M05.662 | Rheumatoid arthritis of left knee with involvement of other organs and systems                                 | ICD-10-CM |
| M05.612 | Rheumatoid arthritis of left shoulder with involvement of other organs and systems                             | ICD-10-CM |
| M05.632 | Rheumatoid arthritis of left wrist with involvement of other organs and systems                                | ICD-10-CM |
| M05.69  | Rheumatoid arthritis of multiple sites with involvement of other organs and systems                            | ICD-10-CM |
| M05.671 | Rheumatoid arthritis of right ankle and foot with involvement of other organs and systems                      | ICD-10-CM |
| M05.621 | Rheumatoid arthritis of right elbow with involvement of other organs and systems                               | ICD-10-CM |
| M05.641 | Rheumatoid arthritis of right hand with involvement of other organs and systems                                | ICD-10-CM |
| M05.651 | Rheumatoid arthritis of right hip with involvement of other organs and systems                                 | ICD-10-CM |
| M05.661 | Rheumatoid arthritis of right knee with involvement of other organs and systems                                | ICD-10-CM |
| M05.611 | Rheumatoid arthritis of right shoulder with involvement of other organs and systems                            | ICD-10-CM |
| M05.631 | Rheumatoid arthritis of right wrist with involvement of other organs and systems                               | ICD-10-CM |
| M05.61  | Rheumatoid arthritis of shoulder with involvement of other organs and systems                                  | ICD-10-CM |
| M05.679 | Rheumatoid arthritis of unspecified ankle and foot with involvement of other organs and systems                | ICD-10-CM |
| M05.629 | Rheumatoid arthritis of unspecified elbow with involvement of other organs and systems                         | ICD-10-CM |
| M05.649 | Rheumatoid arthritis of unspecified hand with involvement of other organs and systems                          | ICD-10-CM |
| M05.659 | Rheumatoid arthritis of unspecified hip with involvement of other organs and systems                           | ICD-10-CM |
| M05.669 | Rheumatoid arthritis of unspecified knee with involvement of other organs and systems                          | ICD-10-CM |
| M05.619 | Rheumatoid arthritis of unspecified shoulder with involvement of other organs and systems                      | ICD-10-CM |
| M05.60  | Rheumatoid arthritis of unspecified site with involvement of other organs and systems                          | ICD-10-CM |
| M05.639 | Rheumatoid arthritis of unspecified wrist with involvement of other organs and systems                         | ICD-10-CM |
| M05.772 | Rheumatoid arthritis with rheumatoid factor of left ankle and foot without organ or systems involvement        | ICD-10-CM |
| M05.771 | Rheumatoid arthritis with rheumatoid factor of right ankle and foot without organ or systems involvement       | ICD-10-CM |
| M05.779 | Rheumatoid arthritis with rheumatoid factor of unspecified ankle and foot without organ or systems involvement | ICD-10-CM |
| M05.72  | Rheumatoid arthritis with rheumatoid factor of elbow without organ or systems involvement                      | ICD-10-CM |
| M05.74  | Rheumatoid arthritis with rheumatoid factor of hand without organ or systems involvement                       | ICD-10-CM |
| M05.75  | Rheumatoid arthritis with rheumatoid factor of hip without organ or systems involvement                        | ICD-10-CM |
| M05.7   | Rheumatoid arthritis with rheumatoid factor without organ or systems involvement                               | ICD-10-CM |
| M05.77  | Rheumatoid arthritis with rheumatoid factor of ankle and foot without organ or systems involvement             | ICD-10-CM |
| M05.76  | Rheumatoid arthritis with rheumatoid factor of knee without organ or systems involvement                       | ICD-10-CM |
| M05.722 | Rheumatoid arthritis with rheumatoid factor of left elbow without organ or systems involvement                 | ICD-10-CM |
| M05.742 | Rheumatoid arthritis with rheumatoid factor of left hand without organ or systems involvement                  | ICD-10-CM |
| M05.752 | Rheumatoid arthritis with rheumatoid factor of left hip without organ or systems involvement                   | ICD-10-CM |
| M05.762 | Rheumatoid arthritis with rheumatoid factor of left knee without organ or systems involvement                  | ICD-10-CM |
| M05.712 | Rheumatoid arthritis with rheumatoid factor of left shoulder without organ or systems involvement              | ICD-10-CM |
| M05.732 | Rheumatoid arthritis with rheumatoid factor of left wrist without organ or systems involvement                 | ICD-10-CM |
| M05.79  | Rheumatoid arthritis with rheumatoid factor of multiple sites without organ or systems involvement             | ICD-10-CM |

|         |                                                                                                          |           |
|---------|----------------------------------------------------------------------------------------------------------|-----------|
| M05.721 | Rheumatoid arthritis with rheumatoid factor of right elbow without organ or systems involvement          | ICD-10-CM |
| M05.741 | Rheumatoid arthritis with rheumatoid factor of right hand without organ or systems involvement           | ICD-10-CM |
| M05.751 | Rheumatoid arthritis with rheumatoid factor of right hip without organ or systems involvement            | ICD-10-CM |
| M05.761 | Rheumatoid arthritis with rheumatoid factor of right knee without organ or systems involvement           | ICD-10-CM |
| M05.711 | Rheumatoid arthritis with rheumatoid factor of right shoulder without organ or systems involvement       | ICD-10-CM |
| M05.731 | Rheumatoid arthritis with rheumatoid factor of right wrist without organ or systems involvement          | ICD-10-CM |
| M05.71  | Rheumatoid arthritis with rheumatoid factor of shoulder without organ or systems involvement             | ICD-10-CM |
| M05.729 | Rheumatoid arthritis with rheumatoid factor of unspecified elbow without organ or systems involvement    | ICD-10-CM |
| M05.749 | Rheumatoid arthritis with rheumatoid factor of unspecified hand without organ or systems involvement     | ICD-10-CM |
| M05.759 | Rheumatoid arthritis with rheumatoid factor of unspecified hip without organ or systems involvement      | ICD-10-CM |
| M05.769 | Rheumatoid arthritis with rheumatoid factor of unspecified knee without organ or systems involvement     | ICD-10-CM |
| M05.719 | Rheumatoid arthritis with rheumatoid factor of unspecified shoulder without organ or systems involvement | ICD-10-CM |
| M05.70  | Rheumatoid arthritis with rheumatoid factor of unspecified site without organ or systems involvement     | ICD-10-CM |
| M05.739 | Rheumatoid arthritis with rheumatoid factor of unspecified wrist without organ or systems involvement    | ICD-10-CM |
| M05.73  | Rheumatoid arthritis with rheumatoid factor of wrist without organ or systems involvement                | ICD-10-CM |
| M05.9   | Rheumatoid arthritis with rheumatoid factor, unspecified                                                 | ICD-10-CM |
| M06.07  | Rheumatoid arthritis without rheumatoid factor, ankle and foot                                           | ICD-10-CM |
| M06.02  | Rheumatoid arthritis without rheumatoid factor, elbow                                                    | ICD-10-CM |
| M06.04  | Rheumatoid arthritis without rheumatoid factor, hand                                                     | ICD-10-CM |
| M06.05  | Rheumatoid arthritis without rheumatoid factor, hip                                                      | ICD-10-CM |
| M06.06  | Rheumatoid arthritis without rheumatoid factor, knee                                                     | ICD-10-CM |
| M06.072 | Rheumatoid arthritis without rheumatoid factor, left ankle and foot                                      | ICD-10-CM |
| M06.022 | Rheumatoid arthritis without rheumatoid factor, left elbow                                               | ICD-10-CM |
| M06.042 | Rheumatoid arthritis without rheumatoid factor, left hand                                                | ICD-10-CM |
| M06.052 | Rheumatoid arthritis without rheumatoid factor, left hip                                                 | ICD-10-CM |
| M06.062 | Rheumatoid arthritis without rheumatoid factor, left knee                                                | ICD-10-CM |
| M06.012 | Rheumatoid arthritis without rheumatoid factor, left shoulder                                            | ICD-10-CM |
| M06.032 | Rheumatoid arthritis without rheumatoid factor, left wrist                                               | ICD-10-CM |
| M06.09  | Rheumatoid arthritis without rheumatoid factor, multiple sites                                           | ICD-10-CM |
| M06.071 | Rheumatoid arthritis without rheumatoid factor, right ankle and foot                                     | ICD-10-CM |
| M06.021 | Rheumatoid arthritis without rheumatoid factor, right elbow                                              | ICD-10-CM |
| M06.041 | Rheumatoid arthritis without rheumatoid factor, right hand                                               | ICD-10-CM |
| M06.051 | Rheumatoid arthritis without rheumatoid factor, right hip                                                | ICD-10-CM |
| M06.061 | Rheumatoid arthritis without rheumatoid factor, right knee                                               | ICD-10-CM |
| M06.011 | Rheumatoid arthritis without rheumatoid factor, right shoulder                                           | ICD-10-CM |
| M06.031 | Rheumatoid arthritis without rheumatoid factor, right wrist                                              | ICD-10-CM |
| M06.01  | Rheumatoid arthritis without rheumatoid factor, shoulder                                                 | ICD-10-CM |

|         |                                                                                  |           |
|---------|----------------------------------------------------------------------------------|-----------|
| M06.079 | Rheumatoid arthritis without rheumatoid factor, unspecified ankle and foot       | ICD-10-CM |
| M06.019 | Rheumatoid arthritis without rheumatoid factor, unspecified shoulder             | ICD-10-CM |
| M06.029 | Rheumatoid arthritis without rheumatoid factor, unspecified elbow                | ICD-10-CM |
| M06.049 | Rheumatoid arthritis without rheumatoid factor, unspecified hand                 | ICD-10-CM |
| M06.059 | Rheumatoid arthritis without rheumatoid factor, unspecified hip                  | ICD-10-CM |
| M06.069 | Rheumatoid arthritis without rheumatoid factor, unspecified knee                 | ICD-10-CM |
| M06.00  | Rheumatoid arthritis without rheumatoid factor, unspecified site                 | ICD-10-CM |
| M06.039 | Rheumatoid arthritis without rheumatoid factor, unspecified wrist                | ICD-10-CM |
| M06.08  | Rheumatoid arthritis without rheumatoid factor, vertebrae                        | ICD-10-CM |
| M06.03  | Rheumatoid arthritis without rheumatoid factor, wrist                            | ICD-10-CM |
| M05.63  | Rheumatoid arthritis of wrist with involvement of other organs and systems       | ICD-10-CM |
| M06.9   | Rheumatoid arthritis, unspecified                                                | ICD-10-CM |
| M05.6   | Rheumatoid arthritis with involvement of other organs and systems                | ICD-10-CM |
| M05     | Rheumatoid arthritis with rheumatoid factor                                      | ICD-10-CM |
| M06.0   | Rheumatoid arthritis without rheumatoid factor                                   | ICD-10-CM |
| M05.372 | Rheumatoid heart disease with rheumatoid arthritis of left ankle and foot        | ICD-10-CM |
| M05.329 | Rheumatoid heart disease with rheumatoid arthritis of unspecified elbow          | ICD-10-CM |
| M05.349 | Rheumatoid heart disease with rheumatoid arthritis of unspecified hand           | ICD-10-CM |
| M05.369 | Rheumatoid heart disease with rheumatoid arthritis of unspecified knee           | ICD-10-CM |
| M05.30  | Rheumatoid heart disease with rheumatoid arthritis of unspecified site           | ICD-10-CM |
| M05.339 | Rheumatoid heart disease with rheumatoid arthritis of unspecified wrist          | ICD-10-CM |
| M05.371 | Rheumatoid heart disease with rheumatoid arthritis of right ankle and foot       | ICD-10-CM |
| M05.379 | Rheumatoid heart disease with rheumatoid arthritis of unspecified ankle and foot | ICD-10-CM |
| M05.319 | Rheumatoid heart disease with rheumatoid arthritis of unspecified shoulder       | ICD-10-CM |
| M05.3   | Rheumatoid heart disease with rheumatoid arthritis                               | ICD-10-CM |
| M05.37  | Rheumatoid heart disease with rheumatoid arthritis of ankle and foot             | ICD-10-CM |
| M05.32  | Rheumatoid heart disease with rheumatoid arthritis of elbow                      | ICD-10-CM |
| M05.34  | Rheumatoid heart disease with rheumatoid arthritis of hand                       | ICD-10-CM |
| M05.35  | Rheumatoid heart disease with rheumatoid arthritis of hip                        | ICD-10-CM |
| M05.36  | Rheumatoid heart disease with rheumatoid arthritis of knee                       | ICD-10-CM |
| M05.322 | Rheumatoid heart disease with rheumatoid arthritis of left elbow                 | ICD-10-CM |
| M05.342 | Rheumatoid heart disease with rheumatoid arthritis of left hand                  | ICD-10-CM |
| M05.352 | Rheumatoid heart disease with rheumatoid arthritis of left hip                   | ICD-10-CM |
| M05.362 | Rheumatoid heart disease with rheumatoid arthritis of left knee                  | ICD-10-CM |
| M05.312 | Rheumatoid heart disease with rheumatoid arthritis of left shoulder              | ICD-10-CM |
| M05.332 | Rheumatoid heart disease with rheumatoid arthritis of left wrist                 | ICD-10-CM |
| M05.39  | Rheumatoid heart disease with rheumatoid arthritis of multiple sites             | ICD-10-CM |
| M05.321 | Rheumatoid heart disease with rheumatoid arthritis of right elbow                | ICD-10-CM |
| M05.341 | Rheumatoid heart disease with rheumatoid arthritis of right hand                 | ICD-10-CM |
| M05.351 | Rheumatoid heart disease with rheumatoid arthritis of right hip                  | ICD-10-CM |
| M05.361 | Rheumatoid heart disease with rheumatoid arthritis of right knee                 | ICD-10-CM |
| M05.311 | Rheumatoid heart disease with rheumatoid arthritis of right shoulder             | ICD-10-CM |
| M05.331 | Rheumatoid heart disease with rheumatoid arthritis of right wrist                | ICD-10-CM |
| M05.31  | Rheumatoid heart disease with rheumatoid arthritis of shoulder                   | ICD-10-CM |
| M05.359 | Rheumatoid heart disease with rheumatoid arthritis of unspecified hip            | ICD-10-CM |
| M05.33  | Rheumatoid heart disease with rheumatoid arthritis of wrist                      | ICD-10-CM |
| M05.172 | Rheumatoid lung disease with rheumatoid arthritis of left ankle and foot         | ICD-10-CM |
| M05.171 | Rheumatoid lung disease with rheumatoid arthritis of right ankle and foot        | ICD-10-CM |
| M05.129 | Rheumatoid lung disease with rheumatoid arthritis of unspecified elbow           | ICD-10-CM |
| M05.139 | Rheumatoid lung disease with rheumatoid arthritis of unspecified wrist           | ICD-10-CM |

|         |                                                                                 |           |
|---------|---------------------------------------------------------------------------------|-----------|
| M05.179 | Rheumatoid lung disease with rheumatoid arthritis of unspecified ankle and foot | ICD-10-CM |
| M05.119 | Rheumatoid lung disease with rheumatoid arthritis of unspecified shoulder       | ICD-10-CM |
| M05.1   | Rheumatoid lung disease with rheumatoid arthritis                               | ICD-10-CM |
| M05.17  | Rheumatoid lung disease with rheumatoid arthritis of ankle and foot             | ICD-10-CM |
| M05.12  | Rheumatoid lung disease with rheumatoid arthritis of elbow                      | ICD-10-CM |
| M05.14  | Rheumatoid lung disease with rheumatoid arthritis of hand                       | ICD-10-CM |
| M05.15  | Rheumatoid lung disease with rheumatoid arthritis of hip                        | ICD-10-CM |
| M05.16  | Rheumatoid lung disease with rheumatoid arthritis of knee                       | ICD-10-CM |
| M05.122 | Rheumatoid lung disease with rheumatoid arthritis of left elbow                 | ICD-10-CM |
| M05.142 | Rheumatoid lung disease with rheumatoid arthritis of left hand                  | ICD-10-CM |
| M05.152 | Rheumatoid lung disease with rheumatoid arthritis of left hip                   | ICD-10-CM |
| M05.162 | Rheumatoid lung disease with rheumatoid arthritis of left knee                  | ICD-10-CM |
| M05.112 | Rheumatoid lung disease with rheumatoid arthritis of left shoulder              | ICD-10-CM |
| M05.132 | Rheumatoid lung disease with rheumatoid arthritis of left wrist                 | ICD-10-CM |
| M05.19  | Rheumatoid lung disease with rheumatoid arthritis of multiple sites             | ICD-10-CM |
| M05.121 | Rheumatoid lung disease with rheumatoid arthritis of right elbow                | ICD-10-CM |
| M05.141 | Rheumatoid lung disease with rheumatoid arthritis of right hand                 | ICD-10-CM |
| M05.151 | Rheumatoid lung disease with rheumatoid arthritis of right hip                  | ICD-10-CM |
| M05.161 | Rheumatoid lung disease with rheumatoid arthritis of right knee                 | ICD-10-CM |
| M05.111 | Rheumatoid lung disease with rheumatoid arthritis of right shoulder             | ICD-10-CM |
| M05.131 | Rheumatoid lung disease with rheumatoid arthritis of right wrist                | ICD-10-CM |
| M05.11  | Rheumatoid lung disease with rheumatoid arthritis of shoulder                   | ICD-10-CM |
| M05.149 | Rheumatoid lung disease with rheumatoid arthritis of unspecified hand           | ICD-10-CM |
| M05.159 | Rheumatoid lung disease with rheumatoid arthritis of unspecified hip            | ICD-10-CM |
| M05.169 | Rheumatoid lung disease with rheumatoid arthritis of unspecified knee           | ICD-10-CM |
| M05.10  | Rheumatoid lung disease with rheumatoid arthritis of unspecified site           | ICD-10-CM |
| M05.13  | Rheumatoid lung disease with rheumatoid arthritis of wrist                      | ICD-10-CM |
| M05.479 | Rheumatoid myopathy with rheumatoid arthritis of unspecified ankle and foot     | ICD-10-CM |
| M05.47  | Rheumatoid myopathy with rheumatoid arthritis of ankle and foot                 | ICD-10-CM |
| M05.42  | Rheumatoid myopathy with rheumatoid arthritis of elbow                          | ICD-10-CM |
| M05.44  | Rheumatoid myopathy with rheumatoid arthritis of hand                           | ICD-10-CM |
| M05.45  | Rheumatoid myopathy with rheumatoid arthritis of hip                            | ICD-10-CM |
| M05.46  | Rheumatoid myopathy with rheumatoid arthritis of knee                           | ICD-10-CM |
| M05.472 | Rheumatoid myopathy with rheumatoid arthritis of left ankle and foot            | ICD-10-CM |
| M05.422 | Rheumatoid myopathy with rheumatoid arthritis of left elbow                     | ICD-10-CM |
| M05.442 | Rheumatoid myopathy with rheumatoid arthritis of left hand                      | ICD-10-CM |
| M05.452 | Rheumatoid myopathy with rheumatoid arthritis of left hip                       | ICD-10-CM |
| M05.462 | Rheumatoid myopathy with rheumatoid arthritis of left knee                      | ICD-10-CM |
| M05.412 | Rheumatoid myopathy with rheumatoid arthritis of left shoulder                  | ICD-10-CM |
| M05.432 | Rheumatoid myopathy with rheumatoid arthritis of left wrist                     | ICD-10-CM |
| M05.49  | Rheumatoid myopathy with rheumatoid arthritis of multiple sites                 | ICD-10-CM |
| M05.471 | Rheumatoid myopathy with rheumatoid arthritis of right ankle and foot           | ICD-10-CM |
| M05.421 | Rheumatoid myopathy with rheumatoid arthritis of right elbow                    | ICD-10-CM |
| M05.441 | Rheumatoid myopathy with rheumatoid arthritis of right hand                     | ICD-10-CM |
| M05.451 | Rheumatoid myopathy with rheumatoid arthritis of right hip                      | ICD-10-CM |
| M05.461 | Rheumatoid myopathy with rheumatoid arthritis of right knee                     | ICD-10-CM |
| M05.411 | Rheumatoid myopathy with rheumatoid arthritis of right shoulder                 | ICD-10-CM |
| M05.431 | Rheumatoid myopathy with rheumatoid arthritis of right wrist                    | ICD-10-CM |
| M05.41  | Rheumatoid myopathy with rheumatoid arthritis of shoulder                       | ICD-10-CM |
| M05.429 | Rheumatoid myopathy with rheumatoid arthritis of unspecified elbow              | ICD-10-CM |

|         |                                                                                   |           |
|---------|-----------------------------------------------------------------------------------|-----------|
| M05.449 | Rheumatoid myopathy with rheumatoid arthritis of unspecified hand                 | ICD-10-CM |
| M05.459 | Rheumatoid myopathy with rheumatoid arthritis of unspecified hip                  | ICD-10-CM |
| M05.469 | Rheumatoid myopathy with rheumatoid arthritis of unspecified knee                 | ICD-10-CM |
| M05.419 | Rheumatoid myopathy with rheumatoid arthritis of unspecified shoulder             | ICD-10-CM |
| M05.40  | Rheumatoid myopathy with rheumatoid arthritis of unspecified site                 | ICD-10-CM |
| M05.439 | Rheumatoid myopathy with rheumatoid arthritis of unspecified wrist                | ICD-10-CM |
| M05.43  | Rheumatoid myopathy with rheumatoid arthritis of wrist                            | ICD-10-CM |
| M05.4   | Rheumatoid myopathy with rheumatoid arthritis                                     | ICD-10-CM |
| M05.549 | Rheumatoid polyneuropathy with rheumatoid arthritis of unspecified hand           | ICD-10-CM |
| M05.559 | Rheumatoid polyneuropathy with rheumatoid arthritis of unspecified hip            | ICD-10-CM |
| M05.569 | Rheumatoid polyneuropathy with rheumatoid arthritis of unspecified knee           | ICD-10-CM |
| M05.50  | Rheumatoid polyneuropathy with rheumatoid arthritis of unspecified site           | ICD-10-CM |
| M05.572 | Rheumatoid polyneuropathy with rheumatoid arthritis of left ankle and foot        | ICD-10-CM |
| M05.571 | Rheumatoid polyneuropathy with rheumatoid arthritis of right ankle and foot       | ICD-10-CM |
| M05.579 | Rheumatoid polyneuropathy with rheumatoid arthritis of unspecified ankle and foot | ICD-10-CM |
| M05.529 | Rheumatoid polyneuropathy with rheumatoid arthritis of unspecified elbow          | ICD-10-CM |
| M05.519 | Rheumatoid polyneuropathy with rheumatoid arthritis of unspecified shoulder       | ICD-10-CM |
| M05.539 | Rheumatoid polyneuropathy with rheumatoid arthritis of unspecified wrist          | ICD-10-CM |
| M05.5   | Rheumatoid polyneuropathy with rheumatoid arthritis                               | ICD-10-CM |
| M05.57  | Rheumatoid polyneuropathy with rheumatoid arthritis of ankle and foot             | ICD-10-CM |
| M05.52  | Rheumatoid polyneuropathy with rheumatoid arthritis of elbow                      | ICD-10-CM |
| M05.54  | Rheumatoid polyneuropathy with rheumatoid arthritis of hand                       | ICD-10-CM |
| M05.55  | Rheumatoid polyneuropathy with rheumatoid arthritis of hip                        | ICD-10-CM |
| M05.56  | Rheumatoid polyneuropathy with rheumatoid arthritis of knee                       | ICD-10-CM |
| M05.522 | Rheumatoid polyneuropathy with rheumatoid arthritis of left elbow                 | ICD-10-CM |
| M05.542 | Rheumatoid polyneuropathy with rheumatoid arthritis of left hand                  | ICD-10-CM |
| M05.552 | Rheumatoid polyneuropathy with rheumatoid arthritis of left hip                   | ICD-10-CM |
| M05.562 | Rheumatoid polyneuropathy with rheumatoid arthritis of left knee                  | ICD-10-CM |
| M05.512 | Rheumatoid polyneuropathy with rheumatoid arthritis of left shoulder              | ICD-10-CM |
| M05.532 | Rheumatoid polyneuropathy with rheumatoid arthritis of left wrist                 | ICD-10-CM |
| M05.59  | Rheumatoid polyneuropathy with rheumatoid arthritis of multiple sites             | ICD-10-CM |
| M05.521 | Rheumatoid polyneuropathy with rheumatoid arthritis of right elbow                | ICD-10-CM |
| M05.541 | Rheumatoid polyneuropathy with rheumatoid arthritis of right hand                 | ICD-10-CM |
| M05.551 | Rheumatoid polyneuropathy with rheumatoid arthritis of right hip                  | ICD-10-CM |
| M05.561 | Rheumatoid polyneuropathy with rheumatoid arthritis of right knee                 | ICD-10-CM |
| M05.511 | Rheumatoid polyneuropathy with rheumatoid arthritis of right shoulder             | ICD-10-CM |
| M05.531 | Rheumatoid polyneuropathy with rheumatoid arthritis of right wrist                | ICD-10-CM |
| M05.51  | Rheumatoid polyneuropathy with rheumatoid arthritis of shoulder                   | ICD-10-CM |
| M05.53  | Rheumatoid polyneuropathy with rheumatoid arthritis of wrist                      | ICD-10-CM |
| M05.219 | Rheumatoid vasculitis with rheumatoid arthritis of unspecified shoulder           | ICD-10-CM |
| M05.279 | Rheumatoid vasculitis with rheumatoid arthritis of unspecified ankle and foot     | ICD-10-CM |
| M05.27  | Rheumatoid vasculitis with rheumatoid arthritis of ankle and foot                 | ICD-10-CM |
| M05.22  | Rheumatoid vasculitis with rheumatoid arthritis of elbow                          | ICD-10-CM |
| M05.25  | Rheumatoid vasculitis with rheumatoid arthritis of hip                            | ICD-10-CM |
| M05.26  | Rheumatoid vasculitis with rheumatoid arthritis of knee                           | ICD-10-CM |
| M05.272 | Rheumatoid vasculitis with rheumatoid arthritis of left ankle and foot            | ICD-10-CM |
| M05.222 | Rheumatoid vasculitis with rheumatoid arthritis of left elbow                     | ICD-10-CM |
| M05.242 | Rheumatoid vasculitis with rheumatoid arthritis of left hand                      | ICD-10-CM |
| M05.252 | Rheumatoid vasculitis with rheumatoid arthritis of left hip                       | ICD-10-CM |
| M05.262 | Rheumatoid vasculitis with rheumatoid arthritis of left knee                      | ICD-10-CM |



|         |                                                                         |           |
|---------|-------------------------------------------------------------------------|-----------|
| M05.212 | Rheumatoid vasculitis with rheumatoid arthritis of left shoulder        | ICD-10-CM |
| M05.232 | Rheumatoid vasculitis with rheumatoid arthritis of left wrist           | ICD-10-CM |
| M05.29  | Rheumatoid vasculitis with rheumatoid arthritis of multiple sites       | ICD-10-CM |
| M05.24  | Rheumatoid vasculitis with rheumatoid arthritis of hand                 | ICD-10-CM |
| M05.271 | Rheumatoid vasculitis with rheumatoid arthritis of right ankle and foot | ICD-10-CM |
| M05.221 | Rheumatoid vasculitis with rheumatoid arthritis of right elbow          | ICD-10-CM |
| M05.241 | Rheumatoid vasculitis with rheumatoid arthritis of right hand           | ICD-10-CM |
| M05.251 | Rheumatoid vasculitis with rheumatoid arthritis of right hip            | ICD-10-CM |
| M05.261 | Rheumatoid vasculitis with rheumatoid arthritis of right knee           | ICD-10-CM |
| M05.211 | Rheumatoid vasculitis with rheumatoid arthritis of right shoulder       | ICD-10-CM |
| M05.231 | Rheumatoid vasculitis with rheumatoid arthritis of right wrist          | ICD-10-CM |
| M05.21  | Rheumatoid vasculitis with rheumatoid arthritis of shoulder             | ICD-10-CM |
| M05.229 | Rheumatoid vasculitis with rheumatoid arthritis of unspecified elbow    | ICD-10-CM |
| M05.249 | Rheumatoid vasculitis with rheumatoid arthritis of unspecified hand     | ICD-10-CM |
| M05.259 | Rheumatoid vasculitis with rheumatoid arthritis of unspecified hip      | ICD-10-CM |
| M05.269 | Rheumatoid vasculitis with rheumatoid arthritis of unspecified knee     | ICD-10-CM |
| M05.20  | Rheumatoid vasculitis with rheumatoid arthritis of unspecified site     | ICD-10-CM |
| M05.239 | Rheumatoid vasculitis with rheumatoid arthritis of unspecified wrist    | ICD-10-CM |
| M05.23  | Rheumatoid vasculitis with rheumatoid arthritis of wrist                | ICD-10-CM |
| M05.2   | Rheumatoid vasculitis with rheumatoid arthritis                         | ICD-10-CM |
| 6954    | Lupus erythematosus                                                     | ICD-9-CM  |
| 710.0   | Systemic lupus erythematosus                                            | ICD-9-CM  |
| M32.0   | Drug-induced systemic lupus erythematosus                               | ICD-10-CM |
| M32.10  | Systemic lupus erythematosus, organ or system involvement unspecified   | ICD-10-CM |
| M32.11  | Endocarditis in systemic lupus erythematosus                            | ICD-10-CM |
| M32.12  | Pericarditis in systemic lupus erythematosus                            | ICD-10-CM |
| M32.13  | Lung involvement in systemic lupus erythematosus                        | ICD-10-CM |
| M32.14  | Glomerular disease in systemic lupus erythematosus                      | ICD-10-CM |
| M32.15  | Tubulo-interstitial nephropathy in systemic lupus erythematosus         | ICD-10-CM |
| M32.19  | Other organ or system involvement in systemic lupus erythematosus       | ICD-10-CM |
| M32.8   | Other forms of systemic lupus erythematosus                             | ICD-10-CM |
| M32.9   | Systemic lupus erythematosus, unspecified                               | ICD-10-CM |
| D68.62  | Lupus anticoagulant syndrome                                            | ICD-10-CM |
| L93     | Lupus erythematosus                                                     | ICD-10-CM |
| M32     | Systemic lupus erythematosus (SLE)                                      | ICD-10-CM |
| M32.1   | Systemic lupus erythematosus with organ or system involvement           | ICD-10-CM |
| 555     | Regional enteritis                                                      | ICD-9-CM  |
| 555.0   | Regional enteritis of small intestine                                   | ICD-9-CM  |
| 555.1   | Regional enteritis of large intestine                                   | ICD-9-CM  |
| 555.2   | Regional enteritis of small intestine with large intestine              | ICD-9-CM  |
| 555.9   | Regional enteritis of unspecified site                                  | ICD-9-CM  |
| K50     | Crohn's disease [regional enteritis]                                    | ICD-10-CM |
| K50.0   | Crohn's disease of small intestine                                      | ICD-10-CM |
| K50.00  | Crohn's disease of small intestine without complications                | ICD-10-CM |
| K50.01  | Crohn's disease of small intestine with complications                   | ICD-10-CM |
| K50.011 | Crohn's disease of small intestine with rectal bleeding                 | ICD-10-CM |
| K50.012 | Crohn's disease of small intestine with intestinal obstruction          | ICD-10-CM |
| K50.013 | Crohn's disease of small intestine with fistula                         | ICD-10-CM |
| K50.014 | Crohn's disease of small intestine with abscess                         | ICD-10-CM |
| K50.018 | Crohn's disease of small intestine with other complication              | ICD-10-CM |

|         |                                                                                  |           |
|---------|----------------------------------------------------------------------------------|-----------|
| K50.019 | Crohn's disease of small intestine with unspecified complications                | ICD-10-CM |
| K50.1   | Crohn's disease of large intestine                                               | ICD-10-CM |
| K50.10  | Crohn's disease of large intestine without complications                         | ICD-10-CM |
| K50.11  | Crohn's disease of large intestine with complications                            | ICD-10-CM |
| K50.111 | Crohn's disease of large intestine with rectal bleeding                          | ICD-10-CM |
| K50.112 | Crohn's disease of large intestine with intestinal obstruction                   | ICD-10-CM |
| K50.113 | Crohn's disease of large intestine with fistula                                  | ICD-10-CM |
| K50.114 | Crohn's disease of large intestine with abscess                                  | ICD-10-CM |
| K50.118 | Crohn's disease of large intestine with other complication                       | ICD-10-CM |
| K50.119 | Crohn's disease of large intestine with unspecified complications                | ICD-10-CM |
| K50.8   | Crohn's disease of both small and large intestine                                | ICD-10-CM |
| K50.80  | Crohn's disease of both small and large intestine without complications          | ICD-10-CM |
| K50.81  | Crohn's disease of both small and large intestine with complications             | ICD-10-CM |
| K50.811 | Crohn's disease of both small and large intestine with rectal bleeding           | ICD-10-CM |
| K50.812 | Crohn's disease of both small and large intestine with intestinal obstruction    | ICD-10-CM |
| K50.813 | Crohn's disease of both small and large intestine with fistula                   | ICD-10-CM |
| K50.814 | Crohn's disease of both small and large intestine with abscess                   | ICD-10-CM |
| K50.818 | Crohn's disease of both small and large intestine with other complication        | ICD-10-CM |
| K50.819 | Crohn's disease of both small and large intestine with unspecified complications | ICD-10-CM |
| K50.9   | Crohn's disease, unspecified                                                     | ICD-10-CM |
| K50.90  | Crohn's disease, unspecified, without complications                              | ICD-10-CM |
| K50.91  | Crohn's disease, unspecified, with complications                                 | ICD-10-CM |
| K50.911 | Crohn's disease, unspecified, with rectal bleeding                               | ICD-10-CM |
| K50.912 | Crohn's disease, unspecified, with intestinal obstruction                        | ICD-10-CM |
| K50.913 | Crohn's disease, unspecified, with fistula                                       | ICD-10-CM |
| K50.914 | Crohn's disease, unspecified, with abscess                                       | ICD-10-CM |
| K50.918 | Crohn's disease, unspecified, with other complication                            | ICD-10-CM |
| K50.919 | Crohn's disease, unspecified, with unspecified complications                     | ICD-10-CM |
| 710.2   | Sicca syndrome                                                                   | ICD-9-CM  |
| M35.00  | Sicca syndrome, unspecified                                                      | ICD-10-CM |
| M35.01  | Sicca syndrome with keratoconjunctivitis                                         | ICD-10-CM |
| M35.02  | Sicca syndrome with lung involvement                                             | ICD-10-CM |
| M35.03  | Sicca syndrome with myopathy                                                     | ICD-10-CM |
| M35.04  | Sicca syndrome with tubulo-interstitial nephropathy                              | ICD-10-CM |
| M35.09  | Sicca syndrome with other organ involvement                                      | ICD-10-CM |
| M35.0   | Sicca syndrome [Sjogren]                                                         | ICD-10-CM |
| 710.4   | Polymyositis                                                                     | ICD-9-CM  |
| M33     | Dermatopolymyositis                                                              | ICD-10-CM |
| M33.2   | Polymyositis                                                                     | ICD-10-CM |
| M33.20  | Polymyositis, organ involvement unspecified                                      | ICD-10-CM |
| M33.21  | Polymyositis with respiratory involvement                                        | ICD-10-CM |
| M33.22  | Polymyositis with myopathy                                                       | ICD-10-CM |
| M33.29  | Polymyositis with other organ involvement                                        | ICD-10-CM |
| M33.9   | Dermatopolymyositis, unspecified                                                 | ICD-10-CM |
| M33.90  | Dermatopolymyositis, unspecified, organ involvement unspecified                  | ICD-10-CM |
| M33.91  | Dermatopolymyositis, unspecified with respiratory involvement                    | ICD-10-CM |
| M33.92  | Dermatopolymyositis, unspecified with myopathy                                   | ICD-10-CM |
| M33.93  | Dermatopolymyositis, unspecified without myopathy                                | ICD-10-CM |
| M33.99  | Dermatopolymyositis, unspecified with other organ involvement                    | ICD-10-CM |
| M36.0   | Dermatopolymyositis in neoplastic disease                                        | ICD-10-CM |

|        |                                                      |           |
|--------|------------------------------------------------------|-----------|
| 710.3  | Dermatomyositis                                      | ICD-9-CM  |
| M33.1  | Other dermatomyositis                                | ICD-10-CM |
| M33.10 | Other dermatomyositis, organ involvement unspecified | ICD-10-CM |
| M33.11 | Other dermatomyositis with respiratory involvement   | ICD-10-CM |
| M33.12 | Other dermatomyositis with myopathy                  | ICD-10-CM |
| M33.13 | Other dermatomyositis without myopathy               | ICD-10-CM |
| M33.19 | Other dermatomyositis with other organ involvement   | ICD-10-CM |
| 273.2  | Other paraproteinemias                               | ICD-9-CM  |
| D89.1  | Cryoglobulinemia                                     | ICD-10-CM |
